# Supplementary material for: Temperature-Promoted Giant Unilamellar Vesicle (GUV) Aggregation: A Way of Multicellular Formation
Source: MDPI journal article supplement (doi:10.3390/cimb45050242), 2023-04-26
Supplement: s1 [file s1]

## Supplementary Materials:

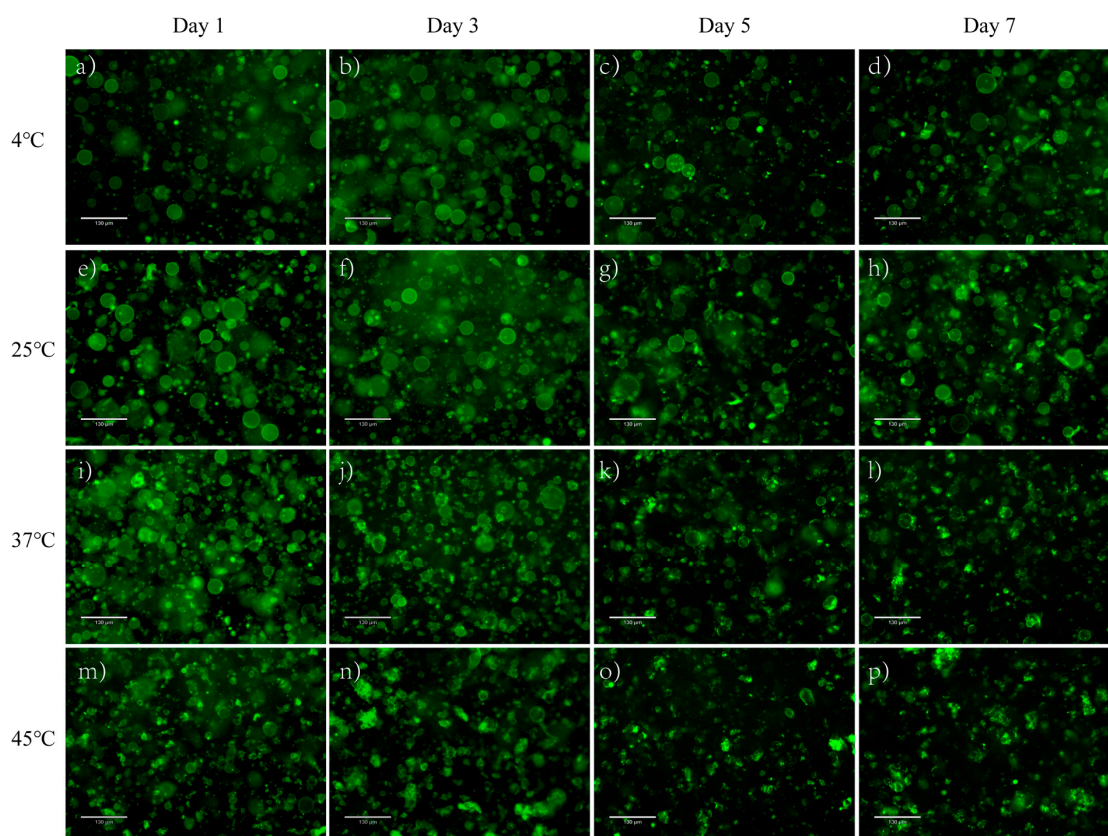

**Figure S1. DiO-labeled GUVs morphology was observed under a microscope at different temperatures and times.** a) 4°C Day 1; b) 4°C Day 3; c) 4°C Day 5; d) 4°C Day 7; e) 25°C Day 1; f) 25°C Day 3; g) 25°C Day 5; h) 25°C Day 7; i) 37°C Day 1; j) 37°C Day 3; k) 37°C Day 5; l) 37°C Day 7; m) 45°C Day 1; n) 45°C Day 3; o) 45°C Day 5; p) 45°C Day 7. scale bar 130  $\mu\text{m}$ .

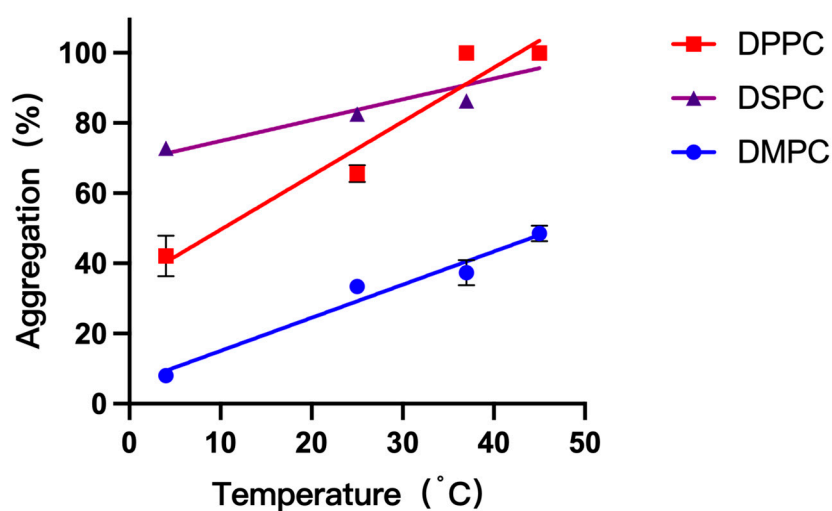

**Figure S2. Degree of aggregation of GUVs prepared from DMPC, DPPC, and DSPC in water.**

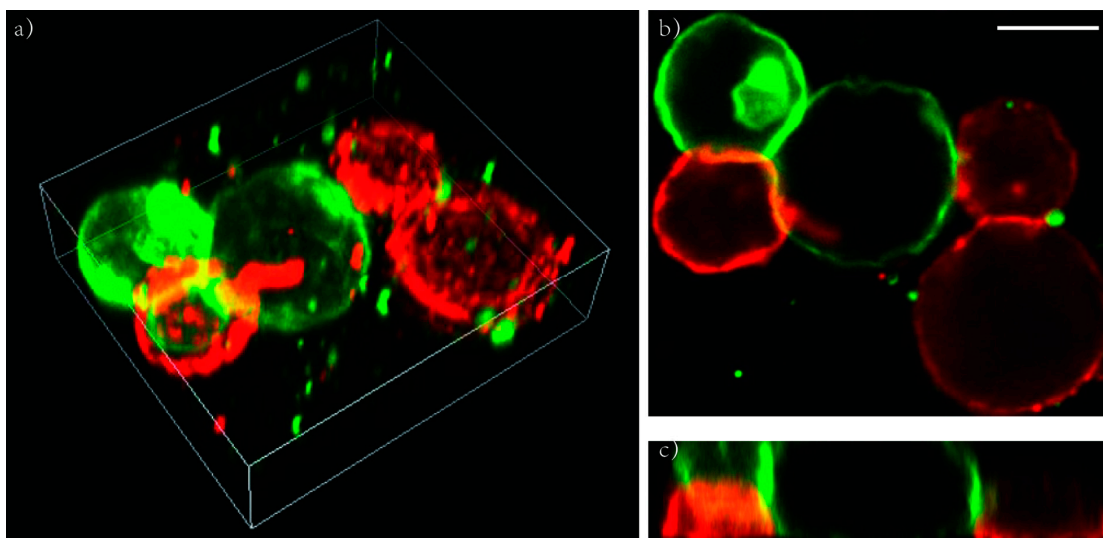

**Figure S3.** The aggregates were scanned with a laser confocal microscope to reconstruct the images (green GUV: labeled by DiO, red GUV: labeled by DiI) ( $70 \times 0.5 \mu\text{m}$ ). a) 3D-image; b) XY-2D-image; c) YZ-2D-image. scale bar  $20 \mu\text{m}$ .

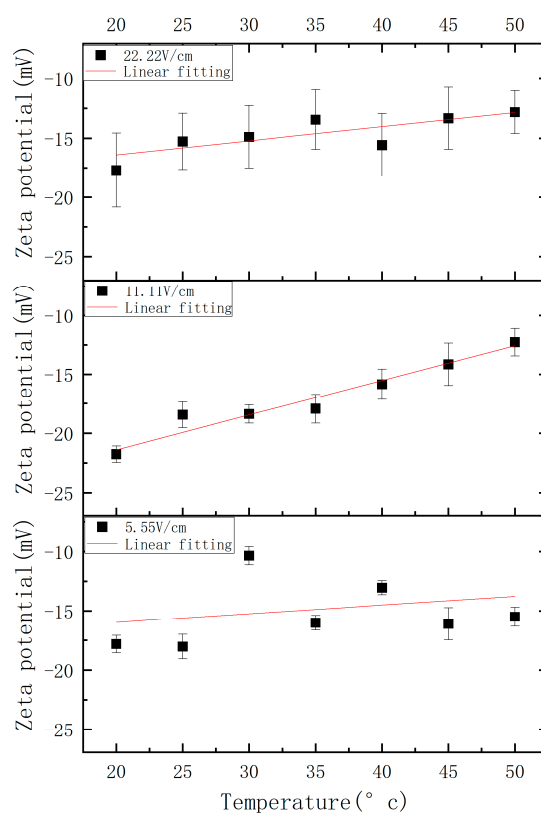

**Figure S4.** Zeta potential of DPPC-GUVs measured in various electric fields as a function of temperature.

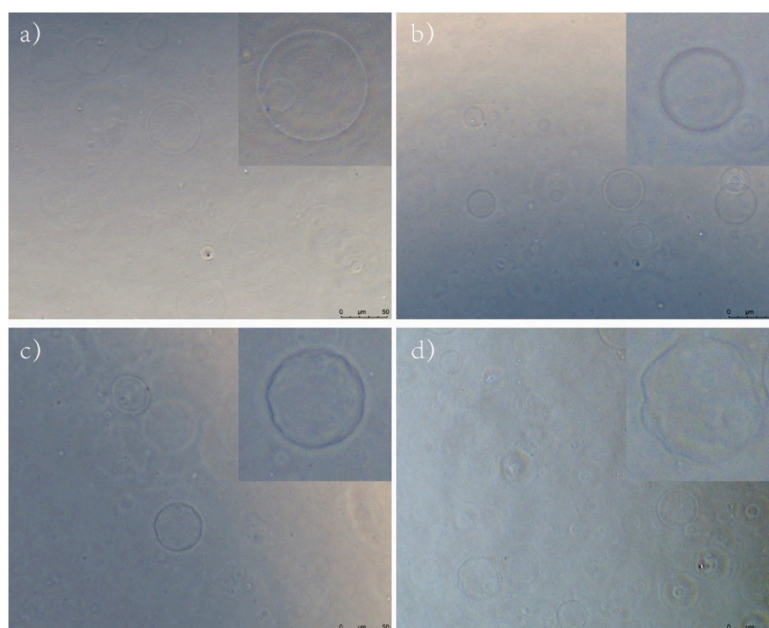

**Figure S5.** The morphology of DPPC-GUVs was observed under a microscope after different electric fields. a) 0 V/cm, b) 5.55 V/cm, c) 11.11 V/cm, d) 22.22 V/cm. scale bar 50  $\mu\text{m}$ .

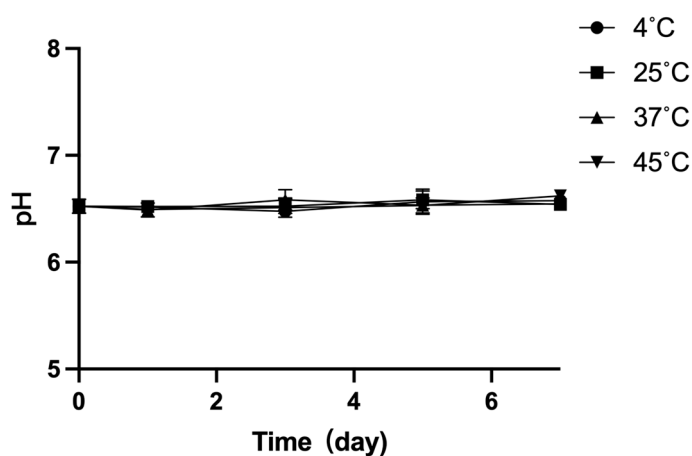

**Figure S6.** pH changes in GUVs solution.

| Temperature  | Free fatty acid concentration ( $\mu\text{mol/mL}$ ) |
|--------------|------------------------------------------------------|
| 4°C (Day 7)  | 0                                                    |
| 25°C (Day 7) | 0                                                    |
| 37°C (Day 7) | 0                                                    |
| 45°C (Day 7) | 0                                                    |

**Table S1** Free fatty acid content of GUVs suspensions after 7 days of incubated at different temperatures.
